# Supplementary material
Source: PubMed Central journal article supplement (PMC8881332)
Supplement: NIHMS1759634-supplement-Supplementary_Materials.pdf [file NIHMS1759634-supplement-Supplementary_Materials.pdf]

Supplementary Materials

**Supplementary Table 1: Comparison of Analytic Sample vs. Excluded Sample**

| Characteristic                                   | Included<br>(N=88) | Excluded<br>(N=33) | p-value |
|--------------------------------------------------|--------------------|--------------------|---------|
| Age (y)                                          | 60.1 (9.0)         | 58.6 (9.2)         | 0.4149  |
| Sex (female)                                     | 73 (83.0 %)        | 23 (69.7%)         | 0.1087  |
| Race (White)                                     | 45 (51.1%)         | 20 (60.6%)         | 0.3522  |
| BMI (kg/m <sup>2</sup> )                         | 34.4 (5.3)         | 36.5 (5.6)         | 0.0619  |
| Weight (kg)                                      | 94.1 (16.7)        | 100.3 (16.2)       | 0.0694  |
| Time from last cancer treatment (y) <sup>a</sup> | 6.0 (3.0, 13.0)    | 6.0 (2.0, 10.0)    | 0.8623  |
| Treatment Group                                  |                    |                    | 0.5248  |
| Self-Directed                                    | 31 (35.2%)         | 9 (27.3%)          |         |
| Metformin                                        | 28 (31.8%)         | 14 (42.4%)         |         |
| Coach-Directed                                   | 29 (33.0%)         | 10 (30.3%)         |         |
| Diet                                             |                    |                    |         |
| Fiber (g/day)                                    | 10.6 (4.8)         | 12.3 (4.5)         | 0.0923  |
| Energy from Fat (%) <sup>b</sup>                 | 33.1 (3.4)         | 32.4 (5.3)         | 0.4179  |
| Inflammation                                     |                    |                    |         |
| hsCRP (mg/dL)                                    | 3.7 (2.0, 6.4)     | 2.9 (1.5, 4.7)     | 0.1128  |
| IL-6 (pg/mL)                                     | 3.5 (2.3, 5.0)     | 3.5 (1.8, 4.5)     | 0.4406  |

P-value is for T-test, Wilcoxon two sample test, or chi-square test as appropriate.

<sup>a</sup> N=86 in Included and N=31 in Excluded

<sup>b</sup> N=32 in excluded group

**Supplementary Table 2: Baseline Spearman correlations of LBP with characteristics**

| Variable                                         | LBP r   |
|--------------------------------------------------|---------|
| Age (y)                                          | -0.15   |
| BMI (kg/m <sup>2</sup> )                         | 0.07    |
| Weight (kg)                                      | -0.04   |
| Time from last cancer treatment (y) <sup>a</sup> | -0.07   |
| Fiber (g/day)                                    | -0.28 † |
| Energy from Fat (%) <sup>b</sup>                 | 0.12    |
| hsCRP (mg/dL)                                    | 0.09    |
| IL-6 (pg/mL)                                     | -0.04   |

<sup>a</sup>: N = 86

<sup>b</sup>: significant testing performed on the transformed log<sub>2</sub>(% energy fat/% energy nonfat)

†: p < 0.05

**Supplementary Table 3: Change from baseline in weight, LBP, fiber, %kcal from fat, and inflammatory biomarkers**

| Characteristic                     | Self-Directed (N=31) |                  | Metformin (N=28) |                         | Coach-Directed (N=29) |                               |
|------------------------------------|----------------------|------------------|------------------|-------------------------|-----------------------|-------------------------------|
|                                    | 6-months             | 12-months        | 6-months         | 12-months               | 6-months              | 12-months                     |
| Δ Weight (% baseline)              | -1.0 (3.3)           | 0.3 (3.8)        | -2.5 (4.4)       | -3.0 (6.2) <sup>†</sup> | -3.7 (5.0)            | -3.0 (4.8) <sup>†</sup>       |
| Δ LBP (μg/mL)                      | 1.2 (2.6)            | 1.0 (4.7)        | 0.6 (3.2)        | 1.0 (3.6)               | -0.5 (4.4)            | -1.0 (4.1)                    |
| Δ Fiber (g/day)                    | 0.3 (4.3)            | -0.8 (4.5)       | -1.0 (2.8)       | -2.1 (3.6)              | 0.7 (3.4)             | -0.3 (3.0)                    |
| Δ Energy from Fat (%) <sup>a</sup> | -0.8 (-2.5, 0.6)     | -1.2 (-2.1, 2.0) | -0.6 (-3.0, 1.3) | -0.1 (-2.4, 1.5)        | -0.9 (-2.3, -0.0)     | -1.3 (-3.1, 0.3)              |
| Δ hsCRP (mg/dL)                    | -0.7 (-1.9, 0.7)     | -0.7 (-2.1, 0.8) | -0.1 (-0.6, 1.0) | -0.0 (-0.9, 1.9)        | -0.4 (-1.6, -0.1)     | -0.4 (-1.4, 0.9) <sup>c</sup> |
| Δ IL-6 (pg/mL)                     | 0.1 (-1.5, 0.8)      | -0.1 (-0.9, 0.6) | 0.3 (-0.4, 1.3)  | 0.1 (-0.5, 1.2)         | -0.1 (-0.9, 0.4)      | -0.7 (-1.1, 0.3)              |

Data presented as mean (std dev) or median (IQR).

<sup>a</sup>: significant testing performed on the change in transformed log2(% energy fat/% energy nonfat); absolute change values reported in this table

<sup>b</sup>: N=27 for 6-month change in % energy from fat in Metformin group

<sup>c</sup>: N=28 for 12-month change in hsCRP in Coach-Directed group

<sup>†</sup>: significantly different from self-directed by Tukey test

**Supplementary Table 4: Correlations Over Time in coach-directed behavioral weight loss intervention (N=29)**

| <b>Variable</b>                  | <b>LBP r</b> | <b>p-value</b> |
|----------------------------------|--------------|----------------|
| Weight (% baseline)              | 0.29         | 0.0480         |
| Fiber (g/day)                    | -0.18        | 0.1623         |
| Energy from Fat (%) <sup>a</sup> | 0.11         | 0.3735         |
| log hsCRP (mg/dL) <sup>b</sup>   | 0.28         | 0.0171         |
| log IL-6 (pg/mL)                 | -0.16        | 0.1913         |

<sup>a</sup>: significant testing performed on the transformed  $\log_2(\% \text{ energy fat}/\% \text{ energy nonfat})$

<sup>b</sup>: N=28

Supplementary Figure 1: SPIRIT participant flow chart from randomization to current analytic sample

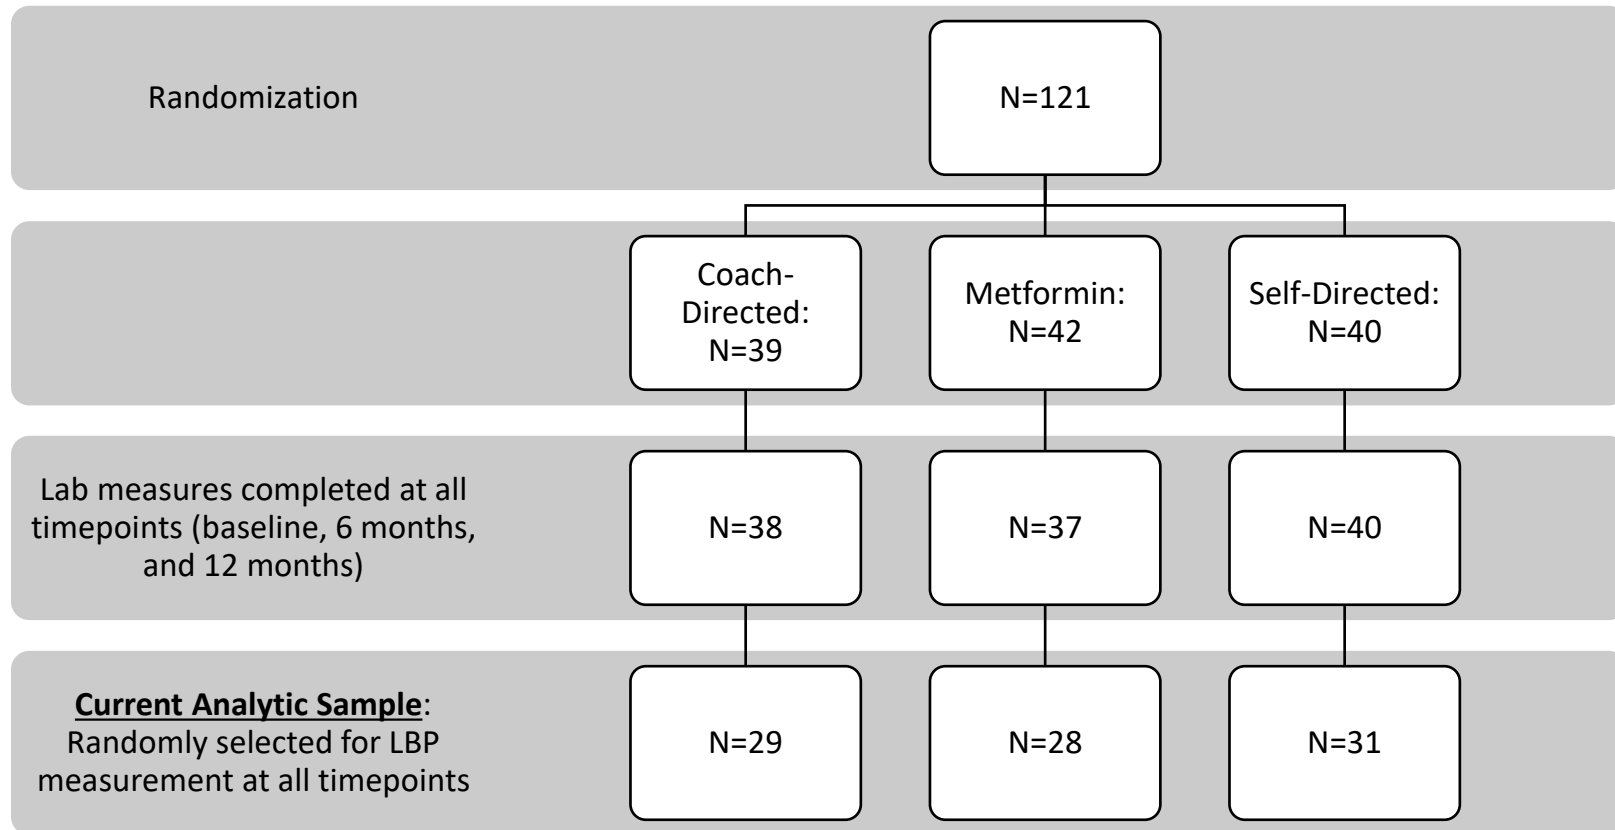

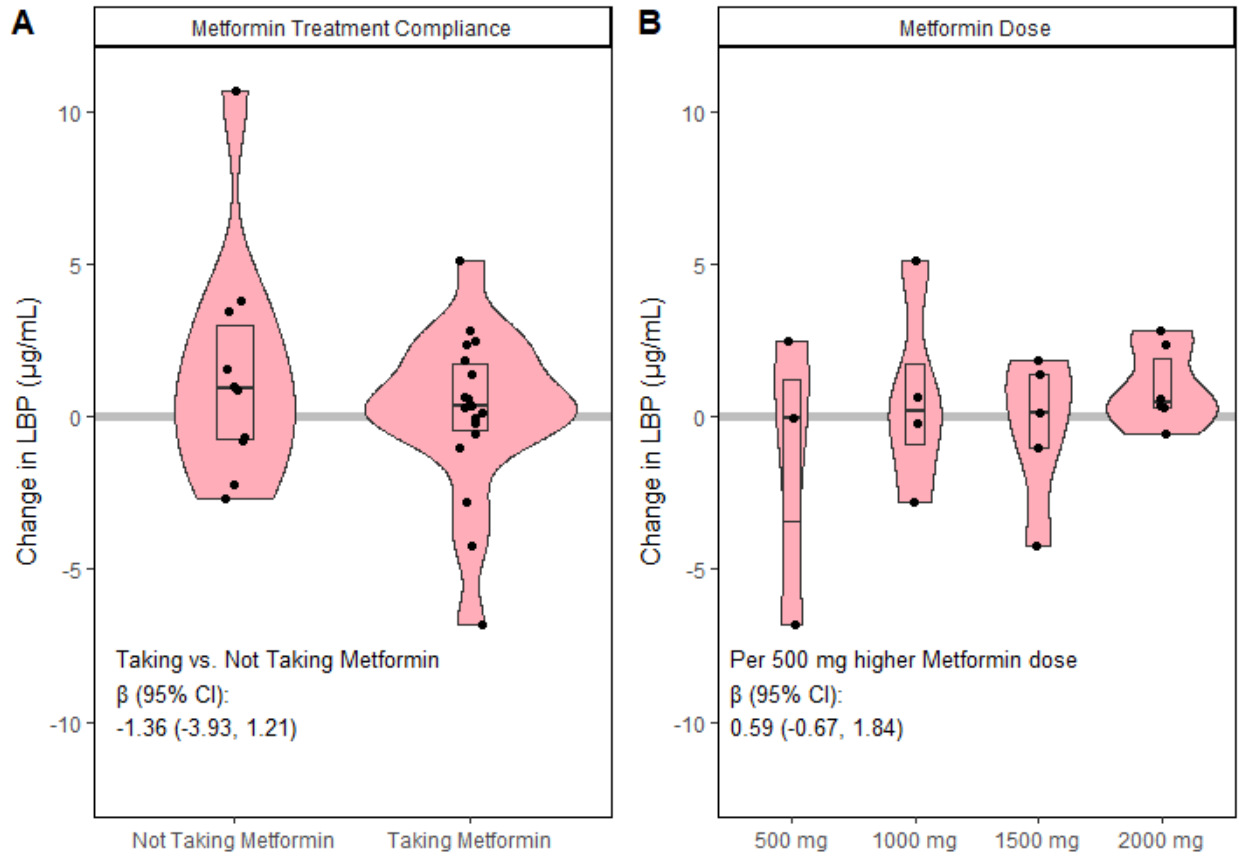

**Supplementary Figure 2: 6-month change in LBP in the metformin vs. self-directed weight loss arm by metformin usage.** (A) 6-month change in LBP within the metformin arm, stratified by those taking metformin at 6 months and those who discontinued use at 6 months; regression coefficient for the compliance indicator is included (B) 6-month change in LBP among those taking metformin at 6 months, by dosage of metformin; regression coefficient for dose as a continuous variable representing a per-500 mg higher metformin dosage.
